# Supplementary material for: Nonsteroidal Mineralocorticoid Receptor Antagonist Finerenone Improves Diastolic Dysfunction in Preclinical Nondiabetic Chronic Kidney Disease
Source: PubMed Central journal article supplement — J Am Heart Assoc. 2024 Jun 6;13(12):e032971. doi: 10.1161/JAHA.123.032971 (PMC11255738; doi:10.1161/jaha.123.032971), 2024-06-06
Supplement: JAH3-13-e032971-s001.pdf [file JAH3-13-e032971-s001.pdf]

# **Supplemental Material**

Figure S1. Heart/body weight ratio in CKD rats after 12 weeks (Protocol 2).

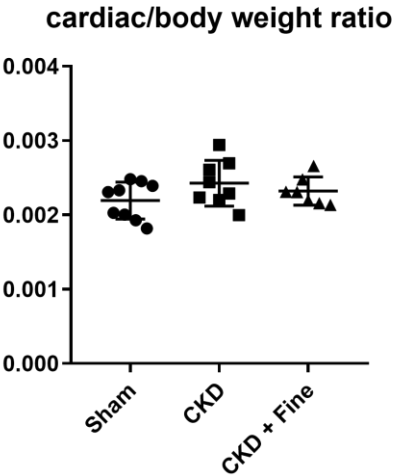

CKD: chronic kidney disease, Fine: finerenone. ANOVA was used for statical analysis, n = 7-9.

**Figure S2. Hemodynamic parameters in CKD after two months of finerenone treatment.**

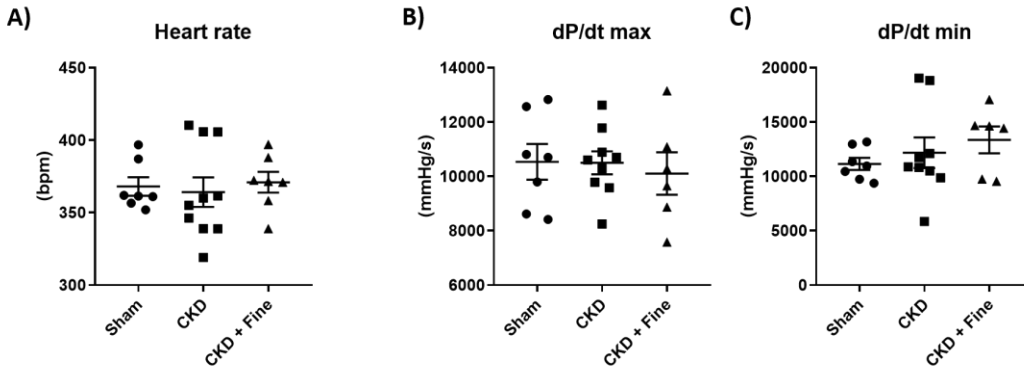

heart rate (A), dP/dt max (B), and dP/dt min (C). CKD: chronic kidney disease, Fine: finerenone. ANOVA was used for statistical analysis, n = 6-8. \*p < 0.05, \*\*p < 0.001, \*\*\*p < 0.0001.
